# Supplementary material
Source: publisher site journal article supplement (http://www.kjim.org/upload/media/kjim-2019-092-suppl7.pdf)
Supplement: Supplementary file 1 [file kjim-2019-092-suppl7.pdf]

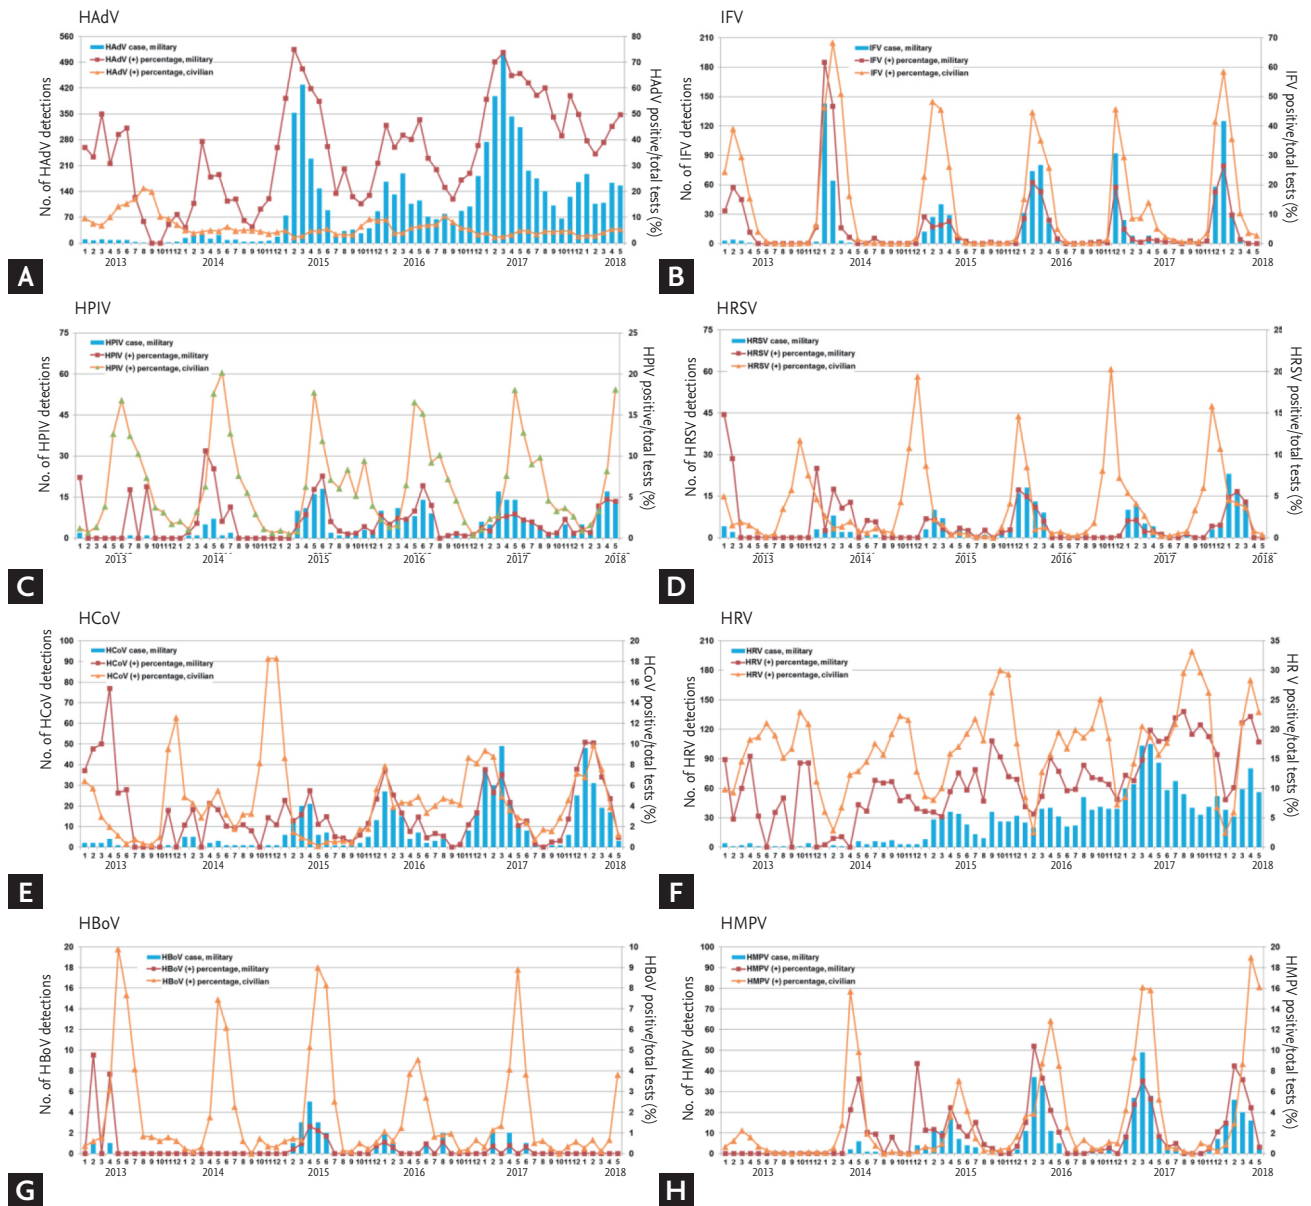

**Supplementary Figure 1.** Epidemiologic trends of eight respiratory viruses (RVs) in the Korean military in comparison with the civilian population, with the scale adjusted for each RV. RV-polymerase chain reaction results for 14 military hospitals from January 2013 to May 2018 are presented with nationwide surveillance data from civilian hospitals. (A) Human adenovirus (HAdV), (B) influenza virus (IFV), (C) human parainfluenza virus (HPIV), (D) human respiratory syncytial virus (HRSV), (E) human coronavirus (HCoV), (F) human rhinovirus (HRV), (G) human bocavirus (HBoV), and (H) human metapneumovirus (HMPV).
